# Supplementary material for: Isopsoralen ameliorates rheumatoid arthritis by targeting MIF
Source: PubMed Central journal article supplement (PMC8447788; doi:10.1186/s13075-021-02619-3), 2021-09-17

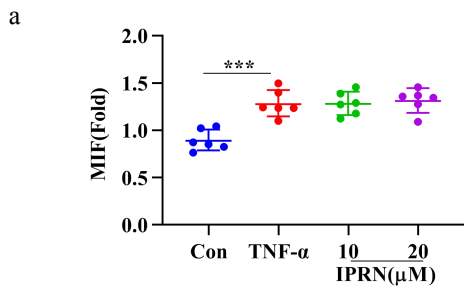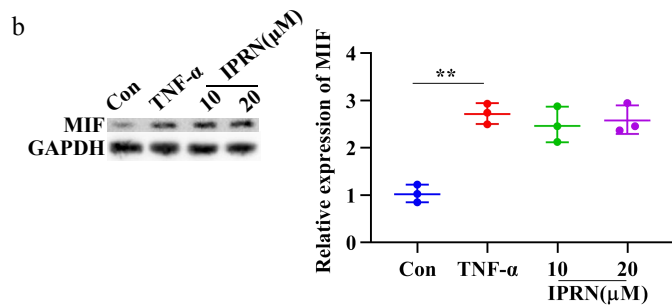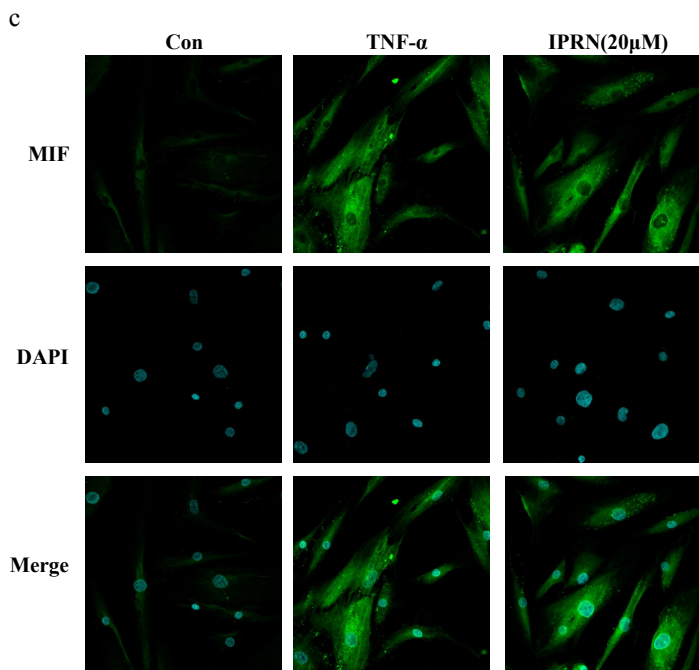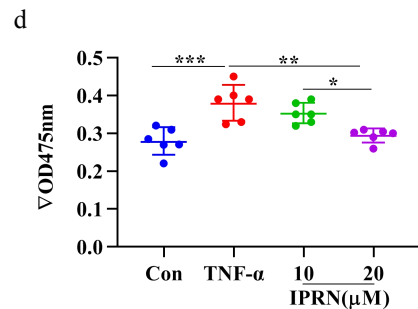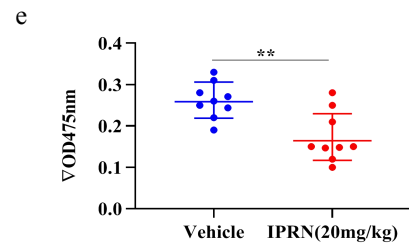

Supplement: 13075_2021_2619_MOESM2_ESM.pdf [file 13075_2021_2619_MOESM2_ESM.pdf]
